# Supplementary material for: Effect of Anaerobic Calcium Oxide Alkalization on the Carbohydrate Molecular Structures, Chemical Profiles, and Ruminal Degradability of Rape Straw
Source: MDPI journal article supplement (doi:10.3390/ani13152421), 2023-07-26
Supplement: s1 [file s1]

**Table S1.** Effect of different CaO dosages and moisture levels on spectral molecular structure of carbohydrates of rape straw<sup>1</sup>.

| Item                                                | Untreated          | 3%                 |                    | 5%                 |                    | 7%                  |                    | SEM <sup>2</sup> | P-value |           |      | Contrast <sup>6</sup> |                    |       |
|-----------------------------------------------------|--------------------|--------------------|--------------------|--------------------|--------------------|---------------------|--------------------|------------------|---------|-----------|------|-----------------------|--------------------|-------|
|                                                     |                    | Straw              | 50%M <sup>7</sup>  | 60%M               | 50% M              | 60% M               | 50% M              |                  | 60% M   | Moisture  | CaO  | M'CaO                 | Control vs Treated | L     |
| Total Carbohydrate (TC) Profiles <sup>3</sup>       |                    |                    |                    |                    |                    |                     |                    |                  |         |           |      |                       |                    |       |
| TC1                                                 | 0.18               | 0.19               | 0.19               | 0.19               | 0.21               | 0.19                | 0.19               | 0.006            | 0.32    | 0.23      | 0.32 | 0.05                  | 0.12               | 0.03  |
| TC2                                                 | 0.39 <sup>a</sup>  | 0.41 <sup>ab</sup> | 0.41 <sup>ab</sup> | 0.42 <sup>ab</sup> | 0.43 <sup>a</sup>  | 0.42 <sup>ab</sup>  | 0.41 <sup>ab</sup> | 0.006            | 0.49    | 0.12      | 0.31 | 0.01                  | 0.01               | 0.05  |
| TC3                                                 | 0.72               | 0.71               | 0.72               | 0.72               | 0.74               | 0.73                | 0.71               | 0.014            | 0.76    | 0.61      | 0.56 | 0.89                  | 0.89               | 0.93  |
| TC1A                                                | 4.80               | 6.03               | 5.73               | 5.93               | 6.37               | 5.58                | 5.52               | 0.368            | 0.94    | 0.32      | 0.62 | 0.03                  | 0.11               | 0.02  |
| TC2A                                                | 16.8               | 18.3               | 17.4               | 16.9               | 19.2               | 17.9                | 18.2               | 0.795            | 0.43    | 0.94      | 0.20 | 0.23                  | 0.24               | 0.45  |
| TC3A                                                | 70.3               | 67.8               | 69.0               | 70.8               | 70.0               | 68.3                | 67.7               | 1.442            | 0.96    | 0.26      | 0.75 | 0.42                  | 0.40               | 0.80  |
| TCA                                                 | 95.6 <sup>a</sup>  | 93.3 <sup>ab</sup> | 93.3 <sup>ab</sup> | 93.1 <sup>ab</sup> | 92.1 <sup>ab</sup> | 91.9 <sup>ab</sup>  | 91.4 <sup>b</sup>  | 1.227            | 0.39    | 0.13      | 0.82 | 0.05                  | <0.0<br>1          | 0.27  |
| Cellulosic Compounds (CEC) Profiles <sup>4</sup>    |                    |                    |                    |                    |                    |                     |                    |                  |         |           |      |                       |                    |       |
| CEC                                                 | 0.14 <sup>a</sup>  | 0.09 <sup>b</sup>  | 0.08 <sup>b</sup>  | 0.03 <sup>c</sup>  | 0.04 <sup>c</sup>  | 0.04 <sup>c</sup>   | 0.03 <sup>c</sup>  | 0.004            | 0.47    | <0.0<br>1 | 0.18 | <0.01                 | <0.0<br>1          | <0.01 |
| CECA                                                | 7.44 <sup>a</sup>  | 4.51 <sup>b</sup>  | 4.32 <sup>b</sup>  | 2.37 <sup>c</sup>  | 2.21 <sup>c</sup>  | 1.98 <sup>c</sup>   | 1.82 <sup>c</sup>  | 0.199            | 0.32    | <0.0<br>1 | 1.00 | <0.01                 | <0.0<br>1          | <0.01 |
| Structural Carbohydrate (STC) Profiles <sup>5</sup> |                    |                    |                    |                    |                    |                     |                    |                  |         |           |      |                       |                    |       |
| STC1                                                | 0.08 <sup>d</sup>  | 0.11 <sup>c</sup>  | 0.11 <sup>c</sup>  | 0.16 <sup>a</sup>  | 0.15 <sup>ab</sup> | 0.14 <sup>abc</sup> | 0.13 <sup>bc</sup> | 0.010            | 0.09    | <0.0<br>1 | 0.46 | <0.01                 | <0.0<br>1          | <0.01 |
| STC2                                                | 0.14 <sup>c</sup>  | 0.20 <sup>ab</sup> | 0.18 <sup>bc</sup> | 0.25 <sup>a</sup>  | 0.24 <sup>a</sup>  | 0.24 <sup>ab</sup>  | 0.24 <sup>ab</sup> | 0.006            | 0.27    | <0.0<br>1 | 0.68 | <0.01                 | <0.0<br>1          | <0.01 |
| STC3                                                | 0.12 <sup>ab</sup> | 0.11 <sup>ab</sup> | 0.11 <sup>ab</sup> | 0.12 <sup>a</sup>  | 0.11 <sup>ab</sup> | 0.11 <sup>ab</sup>  | 0.10 <sup>b</sup>  | 0.004            | 0.02    | 0.10      | 0.36 | 0.07                  | 0.03               | 0.82  |
| STC4                                                | 0.10 <sup>ab</sup> | 0.11 <sup>ab</sup> | 0.11 <sup>ab</sup> | 0.12 <sup>a</sup>  | 0.11 <sup>ab</sup> | 0.10 <sup>ab</sup>  | 0.09 <sup>b</sup>  | 0.005            | 0.02    | 0.03      | 0.60 | 0.47                  | 0.67               | 0.03  |
| STCA                                                | 29.5 <sup>a</sup>  | 27.0 <sup>ab</sup> | 26.1 <sup>ab</sup> | 25.8 <sup>ab</sup> | 25.1 <sup>b</sup>  | 26.0 <sup>ab</sup>  | 24.1 <sup>b</sup>  | 0.668            | 0.07    | 0.14      | 0.66 | <0.01                 | <0.0<br>1          | 0.04  |

<sup>1</sup> Means with different letters within a row are significantly different at  $P < 0.05$ . <sup>2</sup>SEM, standard error of the mean. <sup>3</sup>Total carbohydrate (TC) peak area region and baseline, ca. 1189–909  $\text{cm}^{-1}$  and the three peaks TC1, TC2, TC3 were at the peak height of 1147, 1093, and 1029  $\text{cm}^{-1}$ , respectively; TC1A, TC2A, and TC3A: peak area of peak TC1, TC2, and TC3; TCA: peak area of TC region; <sup>4</sup>Cellulosic compounds (CEC) peak area region and baseline, ca. 1292–1189  $\text{cm}^{-1}$ , and within this region one major peak was centered at ca. 1240  $\text{cm}^{-1}$ ; CECA: peak area of CEC region; <sup>5</sup>Structural carbohydrate (STC) peak area region and baseline, ca. 1487–1189  $\text{cm}^{-1}$ , there were four peaks STC1, STC2, STC3 and SCT4 which were centered at ca. 1461, 1423, 1371, and 1324  $\text{cm}^{-1}$ , respectively; STCA: peak area of STC region. <sup>6</sup>L = linear; Q = quadratic. <sup>7</sup>M = moisture.
